# Supplementary material for: Application of ZnxCd1−xSe-sensitized TiO2 nanotube arrays as photoanodes for solar cells
Source: Royal Society of Chemistry journal article supplement (doi:10.1039/c3ta15310j), 2014-01-01
Supplement: c3ta15310j1.pdf [file c3ta15310j1.pdf]

### Supplementary Information

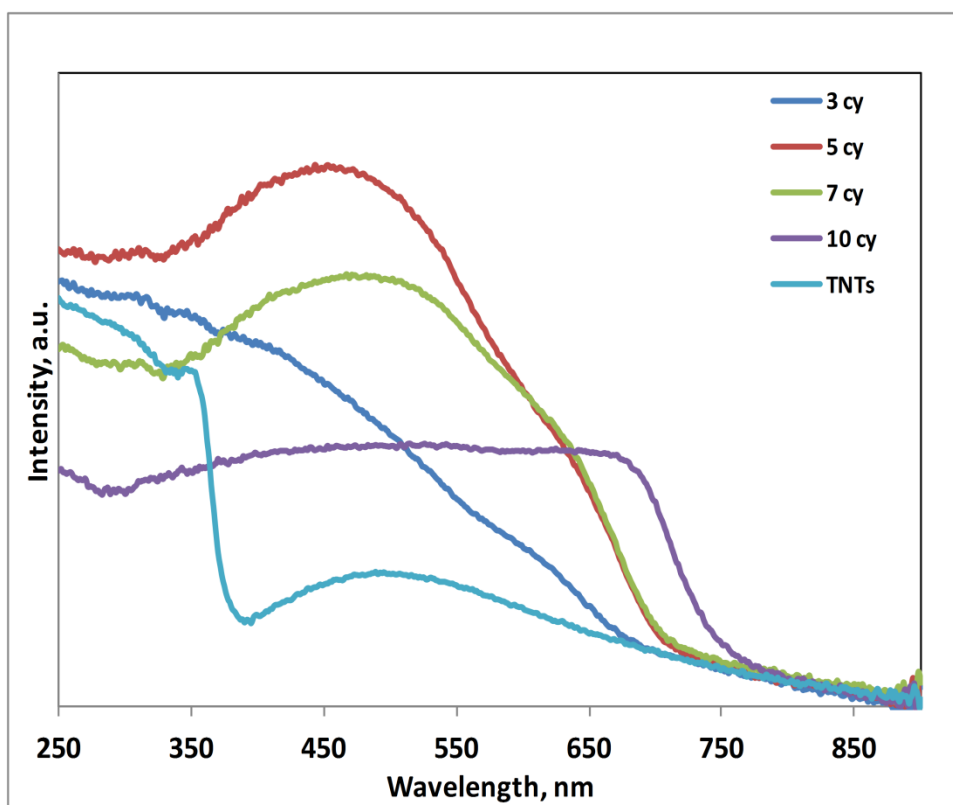

**Fig S1. Absorption spectra of unsensitized and sensitized TiO<sub>2</sub> NTA film with different deposition cycles annealed at 300°C.**

| Electrode                                                 | Annealing Temperature | No. of deposition cycles |          |          |
|-----------------------------------------------------------|-----------------------|--------------------------|----------|----------|
|                                                           |                       | 3 cycles                 | 5 cycles | 7 cycles |
| TiO <sub>2</sub> NTA/Zn <sub>x</sub> Cd <sub>1-x</sub> Se |                       |                          |          |          |
|                                                           | <b>UA</b>             | 2.77                     | 5.23     | 4.74     |
|                                                           | <b>200°C</b>          | 3.88                     | 7.21     | 7.52     |
|                                                           | <b>300°C</b>          | 7.62                     | 11.48    | 12.71    |

**T1. Table summarizing the photocurrent values from I-V analysis**

| Electrode                                                 | Annealing Temperature | No. of deposition cycles |          |          |
|-----------------------------------------------------------|-----------------------|--------------------------|----------|----------|
|                                                           |                       | 3 cycles                 | 5 cycles | 7 cycles |
| TiO <sub>2</sub> NTA/Zn <sub>x</sub> Cd <sub>1-x</sub> Se |                       |                          |          |          |
|                                                           | <b>UA</b>             | 1.99                     | 5.02     | 4.96     |
|                                                           | <b>200°C</b>          | 3.49                     | 6.52     | 7.84     |
|                                                           | <b>300°C</b>          | 6.70                     | 12.02    | 12.04    |

**T1. Table summarizing the photocurrent values from I-t analysis**

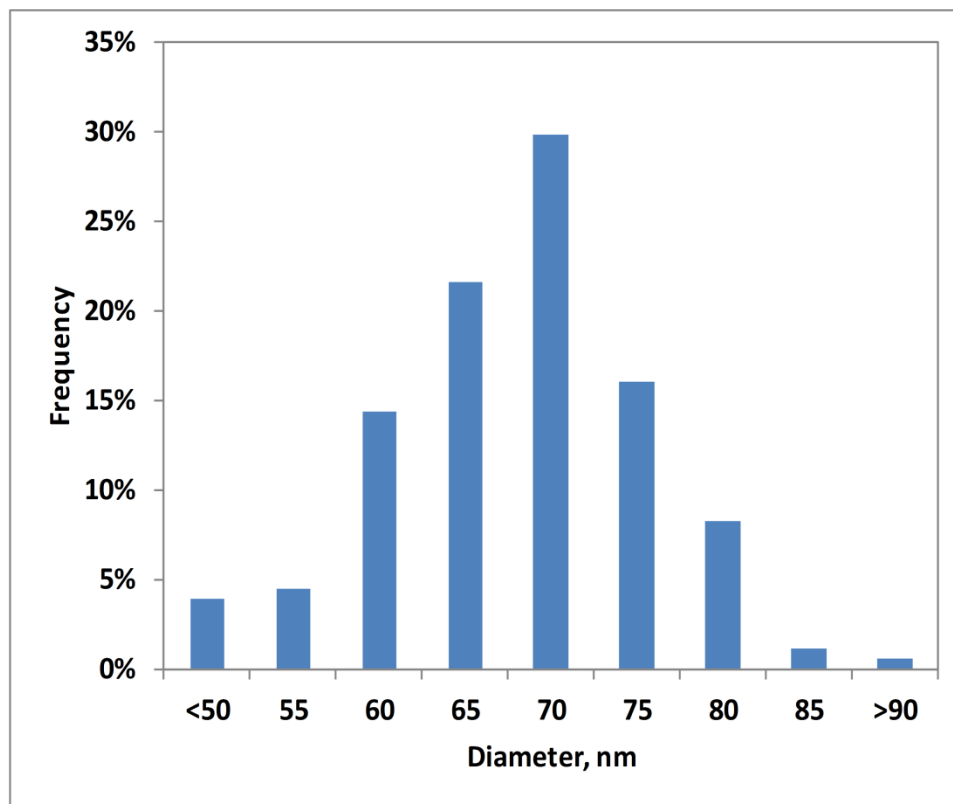

**Fig S2. Histogram depicting diameter of nanotubes.**

### **Raman Analysis**

Raman spectra of  $\text{TiO}_2$  NT/ $\text{Zn}_x\text{Cd}_{1-x}\text{Se}$ (7)-300°C is shown below (Fig. S3). The Raman features at 148, 414, 515 and 632  $\text{cm}^{-1}$  correspond to  $\text{TiO}_2$  nanotubes. An additional feature was observed at 206  $\text{cm}^{-1}$  for the composite film. The peak in question can be attributed to CdSe with another dopant.<sup>1</sup> This data indicates the formation of  $\text{Zn}_x\text{Cd}_{1-x}\text{Se}$  alloy.

Further, as secondary confirmation, Raman features for  $\text{Zn}(\text{NO}_3)_2 \cdot 6\text{H}_2\text{O}$  (at 390  $\text{cm}^{-1}$ )<sup>2</sup> and ZnO were (437 and 574  $\text{cm}^{-1}$ )<sup>3</sup> were not observed. Since the starting material,  $\text{Zn}(\text{NO}_3)_2 \cdot 6\text{H}_2\text{O}$ , and the only other possibility, ZnO, were not found, the only explanation for  $\text{Zn}^{2+}$  seen in XPS is its presence in  $\text{Zn}_x\text{Cd}_{1-x}\text{Se}$ .

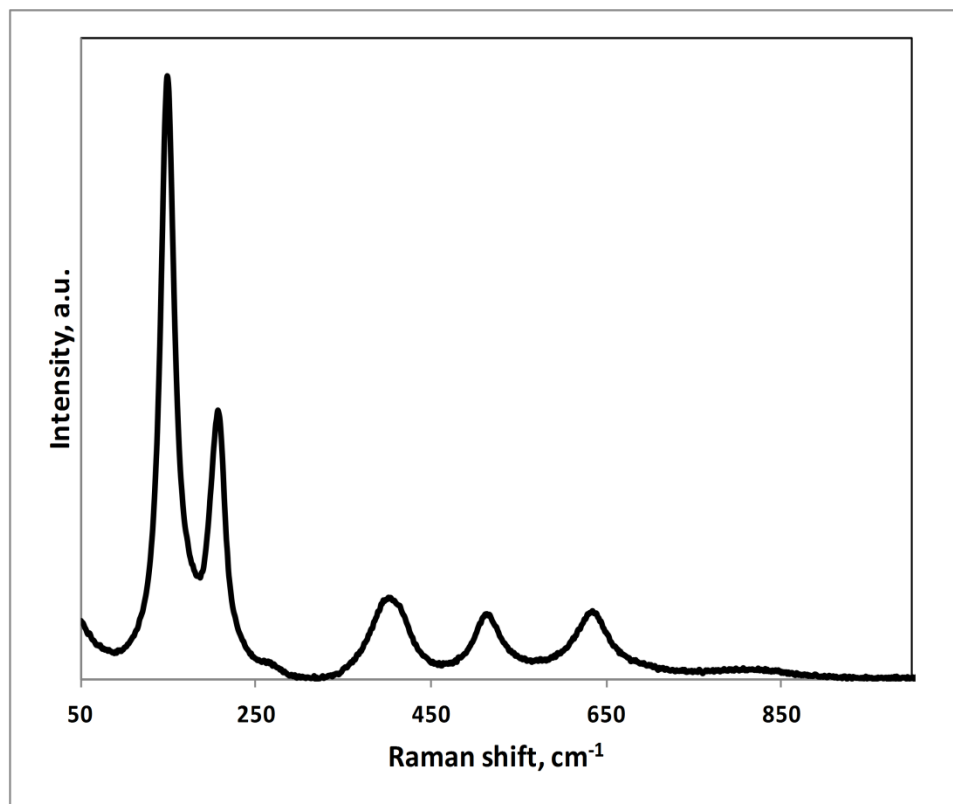

**Fig S3. Raman spectra for the composite film TiO<sub>2</sub> NT/Zn<sub>x</sub>Cd<sub>1-x</sub>Se(7)-300°C.**

### **Stability Study**

Long term I-t study showed that the photocurrent decreased by 53.88% after 2 hours and by 79.6% after about 24 hours (Fig. S4).

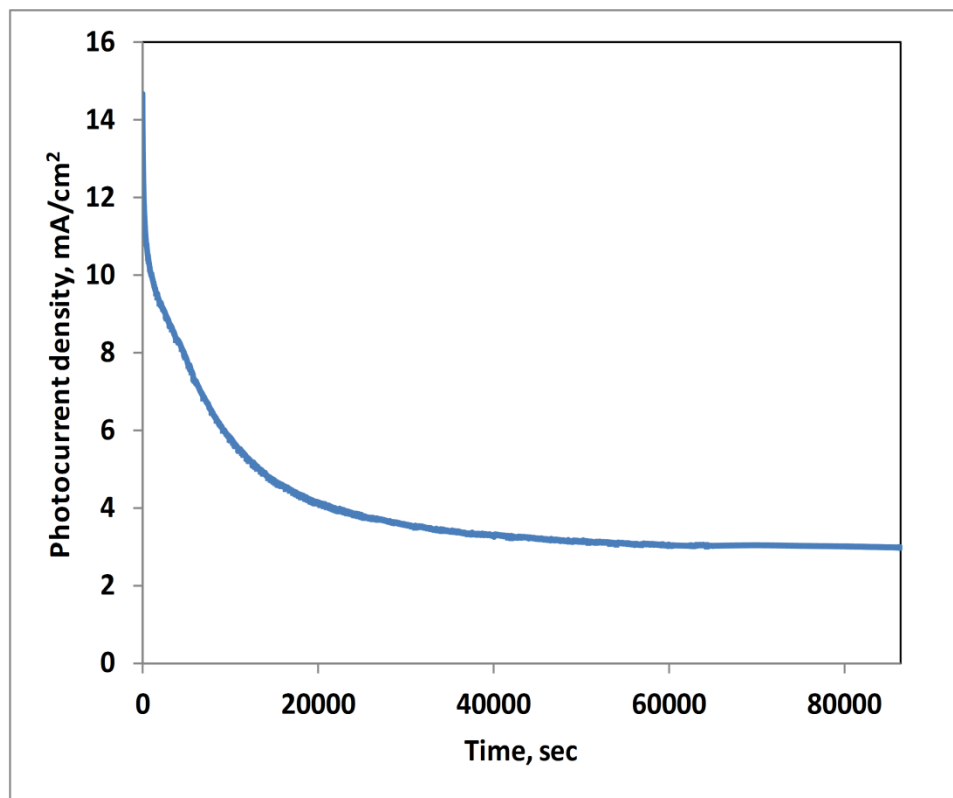

**Fig S4. Long term I-t analysis curve obtained for TiO<sub>2</sub> NTA/ZnCdSe(7)-300°C film.**

To confirm the chemical stability of the photoelectrode, XPS was used to analyze the surface of the film before and after I-t analysis. All the sensitized species (Zn, Cd and Se) were found to be intact on the surface of the film after stability test. To further confirm that Zn<sub>x</sub>Cd<sub>1-x</sub>Se was not converted to Zn<sub>x</sub>Cd<sub>1-x</sub>S, a core-level scan was carried out (Fig. S5) in the low binding energy region (10-20 eV) to confirm the absence of characteristic S 5s peak (~15eV) of CdS (Fig. S6). Though not optimal, only the 5s peak of the S could be used due to interference from Se/Cd at all other binding energy levels. Even at this level Cd 4 (~10eV) is close but does not directly interfere in analysis of S 5s peak. S 5s peak is absent in the sample proving that S did not replace Se. The presence of S 5s in CdS was demonstrated (as a control) by core-level spectrum of standard CdS (Fig. S6)

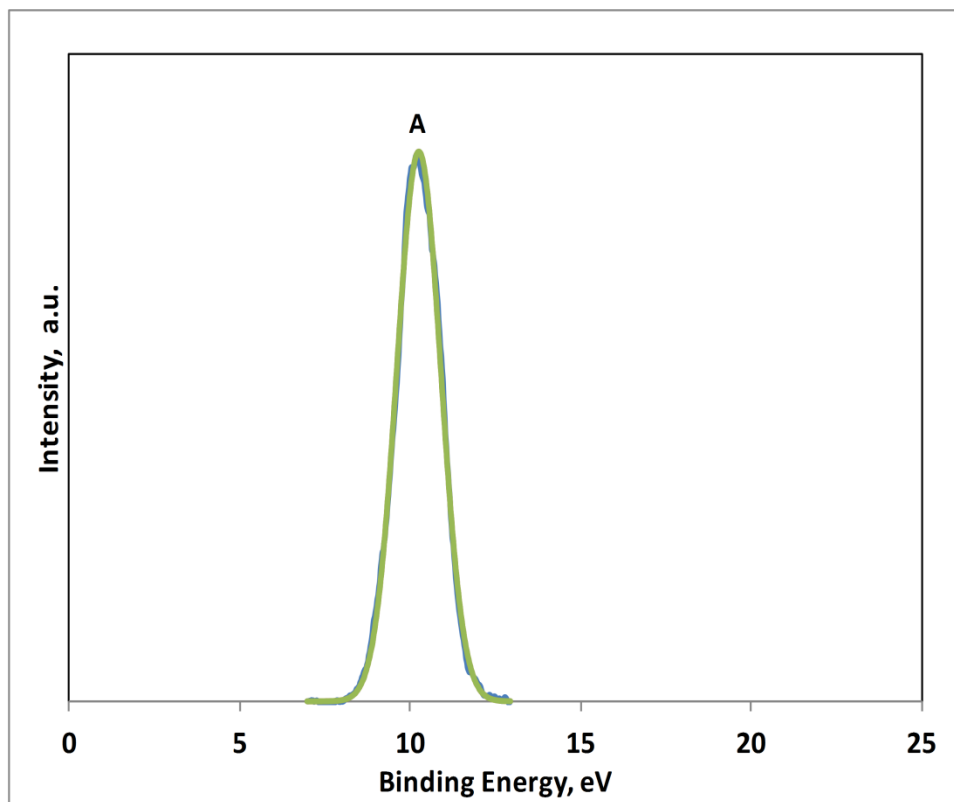

| Peak label | Due to | BE (eV) | FWHM |
|------------|--------|---------|------|
| A          | Cd 4d  | 10.4    | 1.0  |

**Fig. S5:** XPS spectra of TiO<sub>2</sub> NTA/ZnCdSe(7)-300°C film after long term i-t analysis. The peak shown here is due to Cd 4d.

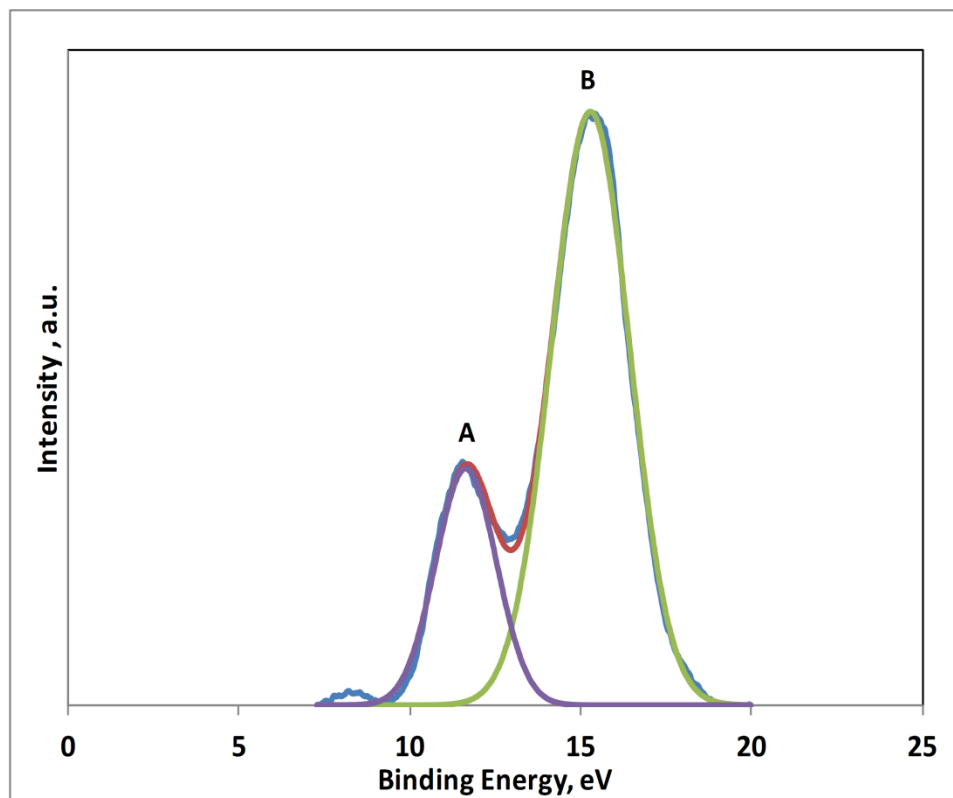

| Peak label | Due to | BE (eV) | FWHM |
|------------|--------|---------|------|
| A          | Cd 4d  | 11.8    | 1.0  |
| B          | S 5s   | 15.5    | 1.1  |

**Fig S6: XPS data for Standard CdS (peak at lower binding energy corresponds to Cd 4d). spectrum is not charge corrected.**

### References

1. V. M. Dzhagan, M. Y. Valakh, A. G. Milekhin, N. A. Yeryukov, D. R. T. Zahn, E. Cassette, T. Pons and B. Dubertret, *The Journal of Physical Chemistry C*, 2013, **117**, 18225-18233.
2. A. Wahab and S. Mahiuddin, *Journal of Chemical & Engineering Data*, 2004, **49**, 126-132.
3. Z. Zhaochun, H. Baibiao, Y. Yongqin and C. Deliang, *Materials Science and Engineering: B*, 2001, **86**, 109-112.
